# Supplementary material
Source: publisher figshare collection journal article supplement (https://diabetesjournals.figshare.com/articles/dataset/_/25075580)
Supplement: Supplementary file 2 [file 1]

# Supplementary Appendix

Differential Effects of Type 2 Diabetes Treatment Regimen on Diabetes Distress and Depressive Symptoms in GRADE: A Randomized Clinical Trial

Jeffrey S. Gonzalez, Ionut Bebu, , Heidi Krause-Steinrauf, Claire J. Hoogendoorn, Gladys Crespo-Ramos, Caroline Presley, Aanand D. Naik, Shihchen Kuo, Mary L. Johnson, Deborah Wexler, Jill P. Crandall, Anne E. Bantle, Valerie Arends, Andrea Cherrington, for the GRADE Research Group

## Table of Contents

|                                                                                                                                                                                                                                                                                                                                                    |   |
|----------------------------------------------------------------------------------------------------------------------------------------------------------------------------------------------------------------------------------------------------------------------------------------------------------------------------------------------------|---|
| <b>eAppendix 1.</b> GRADE Research Group (April 30, 2021) .....                                                                                                                                                                                                                                                                                    | 2 |
| <b>eTable 1.</b> Number of participants with primary EDS outcome data at each visit during study follow-up... 7                                                                                                                                                                                                                                    |   |
| <b>eTable 2.</b> Differences in diabetes distress and depressive symptoms at one year from baseline across all treatment groups. .... 8                                                                                                                                                                                                            |   |
| <b>eTable 3.</b> Differences in diabetes distress and depressive symptoms over the entire 3-year follow-up between insulin glargine vs. the other three groups combined, or between Liraglutide vs. Glargine and between Liraglutide vs. Glimepiride and Sitagliptin combined. .... 9                                                              |   |
| <b>eTable 4.</b> Pairwise differences in diabetes distress (panel A) and depressive symptoms (panel B) among the treatment groups at one year from baseline or over the entire follow-up..... 10                                                                                                                                                   |   |
| <b>eTable 5.</b> Differences in diabetes distress and depressive symptoms between participants in the basal insulin glargine group vs. the other three groups combined without and with adjustment for potential mediators..... 11                                                                                                                 |   |
| <b>eTable 6.</b> Differences at one year in diabetes distress and depressive symptoms between participants in the liraglutide group vs. glimepiride and sitagliptin groups combined without and with adjustment for potential mediators..... 12                                                                                                    |   |
| <b>eTable 7.</b> Difference in Diabetes Distress Primary (panel A) and Depressive Symptoms (panel B) outcomes at one year predicted by baseline age, and across sex, race/ethnicity, and income, first in the Glargine group (left columns), and then in the Liraglutide, Glimepiride and Sitagliptin groups combined (the right columns). .... 13 |   |

## **eAppendix 1. GRADE Research Group (April 30, 2021)**

**Designations:** Principal Investigator (PI); Co-Principal Investigator (Co-PI); Co-Investigator (Co-I); Study Coordinator (SC); Recruitment/Retention Coordinator (RC); Research Staff (RS)

### **Current Clinical Centers**

**Albert Einstein College of Medicine:** Crandall, JP (PI); McKee, MD (Co-PI, past); Behringer-Massera, S (Co-I, past); Brown-Friday, J (SC); Xhori, E (RC, past); Ballentine-Cargill, K (RS); Duran, S (RS); Estrella, H (RS); Gonzalez de la torre, S (RS, past); Lukin, J (RS, past)

**Atlanta VA Medical Center:** Phillips, LS (PI); Burgess, E (Co-I); Olson, D (Co-I); Rhee, M (Co-I); Wilson, P (Co-I); Raines, TS (SC); Boers, J (SC); Costello, J (SC); Maher-Albertelli, M (SC); Mungara, R (SC); Savoye, L (SC, past); White, CA (SC); Gullett, C (SC, past); Holloway, L (SC, past); Morehead, F (SC, past); Person, S (SC, past); Sibymon, M (SC, past); Tanukonda, S (SC, past); Adams, C (RC, past); Ross, A (RC, past)

**Baylor Scott & White Research Institute (Baylor Research Institute):** Balasubramanyam, A (PI); Gaba, R (Co-I); Gonzalez Hattery, E (SC); Ideozu, A (SC); Jimenez, J (SC); Montes, G (RC); Wright, C (RS, past)

**Baylor Research Institute:** Hollander, P (PI); Roe, E (Co-I, past); Jackson, A (SC); Smiley, A (SC); Burt, P (SC, past); Estrada, L (RS); Chionh, K (RS, past)

**Case Western Reserve University/Cleveland VA/MetroHealth Medical Center:** Ismail-Beigi, F (PI); Falck-Ytter, C (Co-PI); Sayyed Kassem, L (Co-PI); Sood, A (Co-PI, past); Tiktin, M (Co-I, SC); Kulow, T (SC); Newman, C (SC); Stancil, KA (SC); Cramer, B (SC, past); Iacoboni, J (SC, past); Kononets, MV (SC, past); Sanders, C (SC, past); Tucker, L (SC, past); Werner, A (SC, past); Maxwell, A (RS); McPhee, G (RS); Patel, C (RS); Colosimo, L (RS, past); Krol, A (RS, past)

**Columbia University Medical Center:** Goland, R (PI); Pring, J (SC); Alfano, L (SC); Kringas, P (SC, past); Hausheer, C (RC, past); Tejada, J (RC, past); Gumpel, K (RS, past); Kirpitch, A (RS, past); Schneier, H (RS, past)

**Duke University Medical Center:** Green, JB (PI); AbouAssi, H (Co-I); Chatterjee, R (Co-I); Feinglos, MN (Co-I, past); English Jones, J (SC, RC); Khan, SA (SC, RC); Kimpel, JB (SC, past); Zimmer, RP (SC, past); Furst, M (RC, past); Satterwhite, BM (RS); Thacker, CR (RS); Evans Kreider, K (RS, past)

**Indiana University:** Mariash, CN (PI); Mather, KJ (PI, past); Ismail, HM (Co-I); Lteif, A (Co-I, past); Mullen, M (SC); Hamilton, T (SC, past); Patel, N (SC, past); Riera, G (RC); Jackson, M (RC, past); Pirics, V (RC, past); Aguillar, D (RS, past); Howard, D (RS, past); Hurt, S (RS, past)

**International Diabetes Center:** Bergenstal, R (PI); Carlson, A (Co-I); Martens, T (Co-I); Johnson, M (SC); Hill, R (SC); Hyatt, J (SC); Jensen, C (SC); Madden, M (SC); Martin, D (SC); Willis, H (SC); Konerza, W (RS); Yang, S (RS); Kleeberger, K (RS, past); Passi, R (RS, past)

**Kaiser Permanente Northwest:** Fortmann, S (PI); Herson, M (Co-I); Mularski, K (Co-I); Glauber, H (Co-I, past); Prihoda, J (Co-I, past); Ash, B (SC); Carlson, C (SC); Ramey, PA (SC); Schield, E (SC); Torgimson-Ojerio, B (SC); Arnold, K (SC, past); Kauffman, B (SC, past); Panos, E (SC, past); Sahnaw, S (RC); Bays, K (RS); Berame, K (RS); Cook, J (RS); Ghioni, D (RS); Gluth, J (RS); Schell, K (RS); Criscola, J (RS, past); Friason, C (RS, past); Jones, S (RS, past); Nazarov, S (RS, past)

**Kaiser Permanente of Georgia:** Barzilay, J (PI); Rassouli, N (Co-PI); Puttnam, R (Co-I); Ojoawo, B (SC); Nelson, R (RC); Curtis, M (SC, past); Hollis, B (SC, past); Sanders-Jones, C (SC, past); Stokes, K (SC, past); El-Haqq, Z (RS, past); Kolli, A (RS, past); Tran, T (RS, past)

**Massachusetts General Hospital:** Wexler, D (PI); Larkin, ME (Co-I, SC); Meigs, J (Co-I); Chambers, B (SC, past); Dushkin, A (SC, past); Rocchio, G (SC, past); Yepes, M (SC, past); Steiner, B (RC); Dulin, H (RC, past); Cayford, M

(RS); Chu, K (RS); DeManbey, A (RS); Hillard, M (RS); Martin, K (RS); Thangthaeng, N (RS); Gurry, L (RS, past); Kochis, R (RS, past); Raymond, E (RS, past); Ripley, V (RS, past); Stevens, C (RS, past)

**MedStar Health Research Institute/ MedStar Baltimore:** Park, J (PI); Aroda, V (PI, past); Ghazi, A (Co-PI); Magee, M (Co-I); Rensing, Ann (Co-I); Loveland, A (SC); Hamm, M (SC); Hurtado, M (SC); Kuhn, A (SC); Leger, J (SC); Manandhar, L (SC); Mwicigi, F (SC); Sanchez, O (SC); Young, T (SC)

**Miami VA Healthcare System/University of Miami:** Garg, R (PI), Lagari-Libhaber, V (PI); Florez, HJ (PI, past); Valencia, WM (PI, past); Marks, J (Co-PI, past); Casula, S (Co-I); Oropesa-Gonzalez, L (SC); Hue, L (SC, past); Cuadot, A (SC, past); Nieto-Martinez, R (SC, past); Riccio Veliz, AK (SC, past); Gutt, M (RC, past); Kendal, YJ (RS, past); Veciana, B. (RS, past)

**Oregon Health & Science University:** Ahmann, A (PI); Aby-Daniel, D (Co-I); Joarder, F (Co-I); Morimoto, V (Co-I); Sprague, C (Co-I); Yamashita, D (Co-I); Cady, N (SC); Rivera-Eschright, N (SC); Kirchhoff, P (SC, past); Morales Gomez, B (RC); Adducci, J (RC, past); Goncharova, A (RC, past)

**Pacific Health Research and Education Institute/VA Pacific Islands:** Hox, SH (PI); Petrovitch, H (Co-PI); Matwichyna, M (SC); Jenkins, V (SC, past); Broadwater, L (RS); Ishii, RR (RS); Bermudez, NO (RS; past)

**Pennington Biomedical Research Center:** Hsia, DS (PI); Cefalu, WT (PI, past); Greenway, FL (Co-I); Waguespack, C (Co-I); King, E (SC); Fry, G (SC); Dragg, A (SC); Gildersleeve, B (SC); Arceneaux, J (SC); Haynes, N (SC, past); Thomassie, A (SC, past); Pavlionis, M (SC, past); Bourgeois, B (RC, past); Hazlett, C (RS)

**San Diego VA Medical Center:** Mudaliar, S (PI); Henry, R (PI, past); Boeder, S (Co-I, past); Pettus, J (Co-I, past); Diaz, E (SC); Garcia-Acosta, D (SC); Maggs, S (SC); DeLue, C (SC, past); Stallings, A (SC, past); Castro, E (RC, past); Hernandez, S (RC, past)

**Southwestern American Indian Center:** Krakoff, J (PI); Curtis, JM (Co-I); Killeen, T (SC); Khalid, M (SC); Joshevama, E (RC, past); Diaz, E (RS); Martin, D (RS); Tsingine, K (RS); Karshner, T (RS, past)

**St. Luke's-Roosevelt Hospital:** Albu, J (Co-PI); Pi-Sunyer, FX (Co-PI, past); Frances, S (Co-I); Maggio, C (SC, past); Ellis, E (RC); Bastawrose, J (RC, past); Gong, X (RS)

**SUNY Downstate Medical Center/New York Hospital-Queens:** Banerji, MA (PI); August, P (Co-I); Lee, M (Co-I); Lorber, D (Co-I); Brown, NM (SC, RC); Josephson, DH (SC); Thomas, LL (SC, RC); Tsovian, M (SC, RC); Cherian, A (SC, RC, past); Jacobson, MH (RS); Mishko, MM (RS)

**The University of North Carolina Diabetes Care Center:** Kirkman, MS (PI); Buse, JB (Co-I); Diner, J (Co-I); Dostou, J (Co-I); Machineni, S (Co-I); Young, L (Co-I); Bergamo, K (Co-I, past); Goley, A (Co-I, past); Kerr, J (Co-I, past); Largay, JF (Co-I, past); Guarda, S (SC); Cuffee, J (SC, past); Culmer, D (SC, past); Fraser, R (RC); Almeida, H (RC, past); Coffey, S (RC, past); Debnam, E (RC, past); Kiker, L (RC, past); Morton, S (RC, past); Josey, K (RS); Fuller, G (RS, past)

**University of Alabama Birmingham:** Garvey, WT (PI); Cherrington, AL (Co-PI); Dyer, D (SC); Lawson, MCR (SC); Griffith, O (SC, past); Agne, A (RC); McCullars, S (RC)

**University of Cincinnati/Cincinnati VA Medical Center:** Cohen, RM (PI); Craig, J (SC); Rogge, MC (SC, past); Burton, K (SC, past); Kersey, K (SC, RC, past); Wilson, C (SC, past); Lipp, S (RC, past); Vonder Meulen, MB (RC, past); Adkins, C (RS); Onadeko, T (RS)

**University of Colorado-Denver/VA:** Rasouli, N (PI); Baker, C (Co-I); Schroeder, E (Co-I, past); Razzaghi, M (Co-I); Lyon, C (Co-I, past); Penalosa, R (Co-I, past); Underkofler, C (SC); Lorch, R (SC); Douglass, S (SC, past); Steiner, S (SC, past)

**University of Iowa:** Sivitz, WI (PI); Cline, E (SC); Knosp, LK (SC); McConnell, J (SC, past); Lowe, T (RC)

**University of Michigan:** Herman, WH (PI); Pop-Busui, R (Co-PI); Tan, MH (Co-I); Martin, C (SC); Waltje, A (SC, RC); Katona, A (SC); Goodhall, L (SC, past); Eggleston, R (RC, past); Kuo, S (RS); Bojescu, S (RS, past); Bule, S (RS, past); Kessler, N (RS, past); LaSalle, E (RS, past); Whitley, K (RS, past)

**University of Minnesota:** Seaquist, ER (PI); Bantle, A (Co-I); Harindhanavudhi, T (Co-I); Kumar, A (Co-I); Redmon, B (Co-I); Bantle, J (Co-I, past); Coe, M (SC); Mech, M (SC); Taddese, A (RC); Lesne, L (RS); Smith, S (RS)

**University of Nebraska Medical Center/Omaha VA:** Desouza, C (PI); Kuechenmeister, L (Co-I); Shivaswamy, V (Co-I); Burbach, S (SC); Rodriguez, MG (SC); Seipel, K (SC); Alfred, A (SC, past); Morales, AL (SC, past); Eggert, J (RS); Lord, G (RS); Taylor, W (RS, past); Tillson, R (RS, past)

**University of New Mexico:** Schade, DS (PI); Adolphe, A (Co-PI); Burge, M (Co-PI, past); Duran-Valdez, E (SC); Martinez, J (RC, past); Bancroft, A (RS); Kunkel, S (RS); Ali Jamaledin Ahmad, F (RS, past); Hernandez McGinnis, D (RS, past); Pucchetti, B (RS, past); Scripsick, E (RS, past); Zamorano, A (RS, past)

**UT Health San Antonio:** DeFronzo, RA (PI); Cersosimo, E (Co-PI); Abdul-Ghani, M (Co-I); Triplitt, C (Co-I); Juarez, D (SC); Mullen, M (SC); Garza, RI (SC, past); Verastiqui, H (SC, past); Wright, K (RC, past); Puckett, C (RS)

**University of Texas-Southwestern Medical Center:** Raskin, P (PI); Rhee, C (Co-I, past); Abraham, S (SC); Jordan, LF (SC); Sao, S (SC); Morton, L (SC, past); Smith, O (SC, past); Osornio Walker, L (RC, past); Schnurr-Breen, L (RC, past); Ayala, R (RS); Kreymer, RB (RS); Sturgess, D (RS, past)

**VA Puget Sound Health Care System/University of Washington:** Utzschneider, KM (PI); Kahn, SE (Co-I); Alarcon-Casas Wright, L (Co-I); Boyko, EJ (Co-I); Tsai, EC (Co-I); Trencle, DL (Co-I, past); Trikudanathan, S (Co-I, past); Fattaleh, BN (SC); Montgomery, BK (SC, past); Atkinson, KM (RS); Kozedub, A (RS); Concepcion, T (RS, past); Moak, C (RS, past); Prikhodko, N (RS, past); Rhothisen, S (RS, past)

**Vanderbilt University:** Elasy, TA (PI); Martin, S (SC); Shackelford, L (RC, RS, past); Goidel, R (RS); Hinkle, N (RS); Lovell, C (RS); Myers, J (RS); Lipps Hogan, J (RS, past)

**Washington University:** McGill, JB (PI); Salam, M (Co-I); Schweiger, T (SC, RC); Kissel, S (SC, RC, past); Recklein, C (SC, past); Clifton, MJ (RS)

**Yale University/Fair Haven Community Health Center/West Haven VA Medical Center:** Tamborlane, W (PI); Camp, A (Co-I); Gulanski, B (Co-I); Inzucchi, SE (Co-I); Pham, K (Co-I); Alguard, M (SC, RC); Gatcomb, P (SC); Lessard, K (SC); Perez, M (SC); Iannone, L (RC); Magenheimer, E (RC); Montosa, A (RC)

## Study Units

**NIH/NIDDK (Sponsor):** Cefalu, WT (Director, Division of Diabetes, Endocrinology and Metabolic Diseases); Fradkin, J (Director, Division of Diabetes, Endocrinology and Metabolic Diseases, past); Burch, HB (Project Scientist); Bremer, AA (Project Scientist, past)

**Chairman's Office, Massachusetts General Hospital, Harvard Medical School:** Nathan, DM (Study Chair, Study Co-PI)

**Executive Committee:** Nathan, DM (Study Chair, Study Co-PI); Lachin, JM (U01 Contact PI, Study Co-PI); Buse, JB (Co-I); Kahn, SE (Co-I); Krause-Steinrauf, H (Co-I, Project Director); Larkin, ME (Co-I, SC); Tiktin, M (Co-I, SC); Wexler, D (PI); Burch, HB (Program Scientist); Bremer, AA (Project Scientist, past)

**Coordinating Center, The George Washington University Biostatistics Center:** Lachin, JM (U01 Contact PI, Study Co-PI); Krause-Steinrauf, H (Co-I, Project Director); Younes, N (Co-I); Bebu, I (RS); Butera, N (RS); Fagan,

A (RS); Gao, Y (RS); Ghosh, A (RS); Gramzinski, MR (RS); Hall, SD (RS); Kazemi, E (RS); Legowski, E (RS); Suratt, C (RS); Tripputi, M (RS); Arey, A (RS, past); Backman, M (RS, past); Bethupu, J (RS, past); Buys, CJ (RS, past); Liu, H (RS, past); Lund, C (RS, past); Mangat Dhaliwal, P (RS, past); McGee, P (RS, past); Mesimer, E (RS, past); Ngo, L (RS, past)

**Central Biochemical Laboratory, University of Minnesota Advanced Research and Diagnostic Laboratory:**

Steffes, M (PI); Seegmiller, J (Co-I); Saenger, A (Co-I, past); Arends, V (SC); Gabrielson, D (SC, past)

**Drug Distribution Center, VA Cooperative Studies Program Clinical Research Pharmacy Coordinating Center:**

Conner, T (PI); Warren, S (PI, past); Day, J (RS); Huminik, J (RS); Scrymgeour, A (RS)

**ECG Reading Center, EPICARE, Wake Forest University:** Soliman, EZ (PI); Pokharel, Y (PI, past), Zhang, ZM (Co-I, past); Campbell, C (SC); Hu, J (SC); Keasler, L (SC); Hensley, S (SC, past); Li, Y (RS)

**Economic Evaluation and Assessment Center:**

**University of Michigan:** Herman, WH (PI); Kuo, S (RS); Martin, C (SC); Waltje, A (SC, RC); Mihalcea, R (RS); Min, DJ (RS); Perez-Rosas, V (RS); Prosser, L (RS); Resnicow, K (RS); Ye, W (RS)

**Centers for Disease Control and Prevention:** Shao, H (RS); Zhang, P (RS)

**Neurocognitive Coordinating Center, Columbia University Medical Center:** Luchsinger, J (PI); Sanchez, D (SC); Assuras, S (RS)

**QWB Reading Center, University of California San Diego Health Services Research Center:** Groessl, E (PI); Sakha, F (SC); Chong, H (SC, past); Hillery, N (RS)

## Collaborators

**Cardiovascular Adjudication Advisor:** Everett, BM (Brigham and Women's Hospital)

**Collaborating Investigators (Recruitment Sites):** Abdouch, I (University of Nebraska Medical Center/Omaha VA); Bahtiyar, G (SUNY Downstate Medical Center); Brantley, P (Pennington Biomedical Research Center (LSU)); Broyles, FE (Swedish Medical Center); Canaris, G (University of Nebraska Medical Center/Omaha VA); Copeland, P (Massachusetts General Hospital); Craine, JJ (UW Valley Medical Center); Fein, WL (Swedish Medical Center); Gliwa, A (SUNY Downstate Medical Center); Hope, L (SUNY Downstate Medical Center); Lee, MS (SUNY Downstate Medical Center); Meiners, R (Pennington Biomedical Research Center (LSU)); Meiners, V (Pennington Biomedical Research Center (LSU)); O'Neal, H (Pennington Biomedical Research Center (LSU)); Park, JE (UW Valley Medical Center); Sacerdote, A (SUNY Downstate Medical Center); Sledge, Jr., E (Pennington Biomedical Research Center (LSU)); Soni, L (SUNY Downstate Medical Center); Steppel-Reznik, J (Massachusetts General Hospital); Turchin, A (Massachusetts General Hospital)

**Beta Cell Ancillary Study:** Brooks-Worrell, B (University of Washington); Hampe, CS (University of Washington); Palmer, JP (University of Washington); Shojaie, A (University of Washington)

**Continuous Glucose Monitoring Sub-study:** Higgins, J (Massachusetts General Hospital; Harvard Medical School)

**Emotional Distress Sub-study:** Golden, S (Johns Hopkins University); Gonzalez, J (Yeshiva University; Albert Einstein College of Medicine); Naik, A (Baylor College of Medicine); Walker, E (Albert Einstein College of Medicine)

**National Diabetes Education Program (NDEP) Sub-study:** Doner Lotenberg, L (Hager Sharp); Gallivan, JM (National Institutes of Health); Lim, J (Hager Sharp); Tuncer, DM (National Institutes of Health)

**Recruitment Ancillary Study:** Behringer-Massera, S (The Mount Sinai Hospital, Beth Israel Medical Center)

**eTable 1.** Number of participants with primary EDS outcome data at each visit during study follow-up.

| Visit  | Baseline | Month 6 | Month 12 | Month 18 | Month 24 | Month 30 | Month 36 |
|--------|----------|---------|----------|----------|----------|----------|----------|
| Number | 1,739    | 1,657   | 1,648    | 1,559    | 1,613    | 1,507    | 1,536    |

**eTable 2.** Differences in diabetes distress and depressive symptoms at one year from baseline across all treatment groups.

|                     | Difference* | LL    | UL    | p-value           |
|---------------------|-------------|-------|-------|-------------------|
| Diabetes Distress   | -0.24       | -0.28 | -0.21 | <b>&lt;0.0001</b> |
| Depressive Symptoms | -0.67       | -0.82 | -0.51 | <b>&lt;0.0001</b> |

\*Difference in means at one year.

Note: Significant p-values are bolded



**eTable3.** Differences in diabetes distress and depressive symptoms over the entire 3-year follow-up between insulin glargine vs. the other three groups combined, or between Liraglutide vs. Glargine and between Liraglutide vs. Glimepiride and Sitagliptin combined.

|                                     | Glargine vs. the Other Three Groups Combined |        |        |         | Liraglutide vs. Glargine |        |       |         | Liraglutide vs. Glimepiride and Sitagliptin Combined |        |        |              |
|-------------------------------------|----------------------------------------------|--------|--------|---------|--------------------------|--------|-------|---------|------------------------------------------------------|--------|--------|--------------|
|                                     | Difference*                                  | LL     | UL     | p-value | Difference*              | LL     | UL    | p-value | Difference*                                          | LL     | UL     | p-value      |
| <b>A. Diabetes Distress</b>         |                                              |        |        |         |                          |        |       |         |                                                      |        |        |              |
| Diabetes Distress Primary           | -0.047                                       | -0.098 | 0.005  | 0.077   | 0.023                    | -0.039 | 0.084 | 0.467   | -0.041                                               | -0.097 | 0.014  | 0.144        |
| Emotional Distress Subscale         | -0.031                                       | -0.084 | 0.023  | 0.262   | 0.019                    | -0.046 | 0.085 | 0.560   | -0.022                                               | -0.082 | 0.038  | 0.476        |
| Regimen Related Distress Subscale   | -0.062                                       | -0.122 | -0.002 | 0.042   | 0.026                    | -0.045 | 0.097 | 0.472   | -0.060                                               | -0.124 | 0.003  | 0.063        |
| Physician Related Distress Subscale | -0.061                                       | -0.114 | -0.008 | 0.023   | 0.039                    | -0.023 | 0.100 | 0.217   | -0.037                                               | -0.093 | 0.019  | 0.197        |
| Interpersonal Distress Subscale     | -0.002                                       | -0.066 | 0.063  | 0.960   | -0.063                   | -0.136 | 0.010 | 0.090   | -0.101                                               | -0.167 | -0.036 | <b>0.003</b> |
| <b>B. Depressive Symptoms</b>       |                                              |        |        |         |                          |        |       |         |                                                      |        |        |              |
| Depressive Symptoms Primary         | -0.111                                       | -0.350 | 0.128  | 0.364   | 0.245                    | -0.048 | 0.538 | 0.101   | 0.188                                                | -0.064 | 0.439  | 0.144        |
| Somatic Symptoms Score              | -0.018                                       | -0.050 | 0.015  | 0.278   | 0.041                    | 0.001  | 0.080 | 0.044   | 0.032                                                | -0.003 | 0.066  | 0.071        |
| Cognitive-Affective Symptoms Score  | -0.007                                       | -0.041 | 0.027  | 0.690   | 0.014                    | -0.027 | 0.056 | 0.505   | 0.010                                                | -0.025 | 0.045  | 0.576        |

\*Difference in means over the entire follow-up

Note: Significant p-values are bolded.

**eTable 4.** Pairwise differences in diabetes distress (panel A) and depressive symptoms (panel B) among the treatment groups at one year from baseline or over the entire follow-up.

|                                       | Comparisons at One Year From Baseline |       |              | Comparisons Over the Entire Follow-Up |       |         |
|---------------------------------------|---------------------------------------|-------|--------------|---------------------------------------|-------|---------|
|                                       | Difference*                           | SE    | p-value      | Difference*                           | SE    | p-value |
| <b>A. Diabetes Distress Primary</b>   |                                       |       |              |                                       |       |         |
| Glimepiride vs. Glargine              | 0.151                                 | 0.043 | <b>0.003</b> | 0.069                                 | 0.034 | 0.264   |
| Liraglutide vs. Glargine              | 0.036                                 | 0.040 | 0.418        | 0.020                                 | 0.032 | 0.634   |
| Sitagliptin vs. Glargine              | 0.116                                 | 0.039 | <b>0.010</b> | 0.052                                 | 0.033 | 0.300   |
| Glimepiride vs. Liraglutide           | 0.115                                 | 0.044 | <b>0.019</b> | 0.049                                 | 0.034 | 0.300   |
| Sitagliptin vs. Liraglutide           | 0.080                                 | 0.041 | 0.077        | 0.032                                 | 0.033 | 0.494   |
| Glimepiride vs. Sitagliptin           | 0.036                                 | 0.044 | 0.418        | 0.017                                 | 0.036 | 0.634   |
| <b>B. Depressive Symptoms Primary</b> |                                       |       |              |                                       |       |         |
| Glimepiride vs. GlargineYr1           | 0.019                                 | 0.192 | 0.920        | -0.017                                | 0.151 | 0.909   |
| Liraglutide vs. GlargineYr1           | 0.293                                 | 0.205 | 0.458        | 0.236                                 | 0.150 | 0.346   |
| Sitagliptin vs. GlargineYr1           | 0.181                                 | 0.190 | 0.539        | 0.110                                 | 0.147 | 0.546   |
| Glimepiride vs. LiraglutideYr1        | -0.273                                | 0.189 | 0.458        | -0.253                                | 0.151 | 0.346   |
| Sitagliptin vs. LiraglutideYr1        | -0.112                                | 0.186 | 0.656        | -0.126                                | 0.146 | 0.546   |
| Glimepiride vs. SitagliptinYr1        | -0.161                                | 0.176 | 0.539        | -0.127                                | 0.150 | 0.546   |

\*Difference in means

SE=standard error

Note: p-values are adjusted for the six pairwise comparisons using the Holm procedure; significant values are bolded.

**eTable 5.** Differences in diabetes distress and depressive symptoms between participants in the basal insulin glargine group vs. the other three groups combined without and with adjustment for potential mediators.

|                                    | Diabetes Distress Primary |        |        |                  | PHQ-8 Total |    |       |         |
|------------------------------------|---------------------------|--------|--------|------------------|-------------|----|-------|---------|
|                                    | Difference*               | LL     | UL     | p-value          | Difference* | LL | UL    | p-value |
| <b>No Mediator</b>                 | -0.101                    | -0.164 | -0.037 | <b>0.002</b>     | -0.165      | -  | 0.158 | 0.316   |
| <b>Mediator</b>                    |                           |        |        |                  |             |    |       |         |
| <b>DTSQ</b>                        | -0.114                    | -0.177 | -0.051 | <b>&lt;0.001</b> | -0.221      | -  | 0.102 | 0.179   |
| <b>Side Effects†</b>               | -0.100                    | -0.163 | -0.037 | <b>0.002</b>     | -0.145      | -  | 0.176 | 0.377   |
| <b>Rapid Acting Insulin Aspart</b> | -0.095                    | -0.159 | -0.032 | <b>0.003</b>     | -0.151      | -  | 0.167 | 0.353   |
| <b>Hypoglycemia</b>                | -0.101                    | -0.164 | -0.038 | <b>0.002</b>     | -0.169      | -  | 0.153 | 0.303   |
| <b>BMI</b>                         | -0.103                    | -0.165 | -0.040 | <b>0.001</b>     | -0.171      | -  | 0.153 | 0.300   |
| <b>HbA1c</b>                       | -0.108                    | -0.170 | -0.046 | <b>0.001</b>     | -0.177      | -  | 0.145 | 0.281   |

\*Difference in means at one year

†Defined as weekly or daily occurrences of at least one of nausea, vomiting, bloating or diarrhea over the last 30 days.

DDS=Diabetes Distress Scale

PHQ-8=Patient Health Questionnaire

DTSQ=Diabetes Treatment Satisfaction Questionnaire

BMI=Body Mass Index

Note: Significant p-values are bolded.

**eTable 6.** Differences at one year in diabetes distress and depressive symptoms between participants in the liraglutide group vs. glimepiride and sitagliptin groups combined without and with adjustment for potential mediators.

|                                    | Diabetes Distress Primary |        |        |              | Depressive Symptoms Primary |        |       |         |
|------------------------------------|---------------------------|--------|--------|--------------|-----------------------------|--------|-------|---------|
|                                    | Difference*               | LL     | UL     | p-value      | Difference*                 | LL     | UL    | p-value |
| <b>No Mediator</b>                 | -0.097                    | -0.169 | -0.026 | <b>0.008</b> | 0.189                       | -0.135 | 0.513 | 0.252   |
| <b>Mediator</b>                    | -0.096                    | -0.167 | -0.025 | <b>0.008</b> | 0.188                       | -0.134 | 0.509 | 0.253   |
| <b>DTSQ</b>                        | -0.104                    | -0.176 | -0.033 | <b>0.004</b> | 0.181                       | -0.141 | 0.502 | 0.271   |
| <b>Side Effects†</b>               | -0.100                    | -0.172 | -0.028 | <b>0.006</b> | 0.141                       | -0.179 | 0.460 | 0.388   |
| <b>Rapid Acting Insulin Aspart</b> | -0.096                    | -0.168 | -0.024 | <b>0.009</b> | 0.210                       | -0.121 | 0.541 | 0.215   |
| <b>Hypoglycemia</b>                | -0.098                    | -0.170 | -0.026 | <b>0.008</b> | 0.182                       | -0.142 | 0.505 | 0.272   |
| <b>BMI</b>                         | -0.075                    | -0.147 | -0.003 | 0.043        | 0.243                       | -0.093 | 0.578 | 0.157   |
| <b>HbA1c</b>                       | -0.097                    | -0.169 | -0.026 | <b>0.008</b> | 0.189                       | -0.135 | 0.513 | 0.252   |

\*Difference in means at one year

†Defined as weekly or daily occurrences of at least one of nausea, vomiting, bloating or diarrhea over the last 30 days.

LL=Lower Limit of confidence interval

UL=Upper Limit of confidence interval

DTSQ=Diabetes Treatment Satisfaction Questionnaire

BMI=Body Mass Index

Note: Significant p-values are bolded.

**eTable 7.** Difference in Diabetes Distress Primary (panel A) and Depressive Symptoms Primary (panel B) outcomes at one year predicted by baseline age, and across sex, race/ethnicity, and income, first in the Glargine group (left columns), and then in the Liraglutide, Glimepiride and Sitagliptin groups combined (the right columns).

|                                | Glargine Group |        |        |                  | Liraglutide, Glimepiride and Sitagliptin Combined |        |        |                  |
|--------------------------------|----------------|--------|--------|------------------|---------------------------------------------------|--------|--------|------------------|
| A. Diabetes Distress Primary   |                |        |        |                  |                                                   |        |        |                  |
|                                | Difference*    | LL     | UL     | p-value          | Difference*                                       | LL     | UL     | p-value          |
| Age (per 1 year older age)     | -0.006         | -0.010 | -0.003 | <b>0.001</b>     | -0.010                                            | -0.012 | -0.007 | <b>&lt;0.001</b> |
| Sex (vs. Male)                 |                |        |        |                  |                                                   |        |        |                  |
| Female                         | 0.026          | -0.056 | 0.109  | 0.531            | 0.067                                             | 0.015  | 0.119  | 0.011            |
| Race/Ethnicity (vs. NHW)       |                |        |        |                  |                                                   |        |        |                  |
| Hispanic                       | 0.237          | 0.105  | 0.369  | <b>&lt;0.001</b> | 0.146                                             | 0.072  | 0.221  | <b>&lt;0.001</b> |
| NHB                            | 0.005          | -0.104 | 0.115  | 0.926            | 0.105                                             | 0.036  | 0.173  | <b>0.003</b>     |
| NH Other                       | 0.087          | -0.021 | 0.196  | 0.114            | 0.155                                             | 0.068  | 0.242  | <b>0.001</b>     |
| Income (vs. <10K)              |                |        |        |                  |                                                   |        |        |                  |
| 10-20k                         | 0.045          | -0.291 | 0.381  | 0.793            | 0.029                                             | -0.124 | 0.183  | 0.708            |
| 20-50k                         | -0.079         | -0.403 | 0.245  | 0.631            | -0.046                                            | -0.174 | 0.082  | 0.485            |
| >50k                           | -0.077         | -0.392 | 0.239  | 0.633            | -0.123                                            | -0.247 | 0.001  | 0.052            |
| B. Depressive Symptoms Primary |                |        |        |                  |                                                   |        |        |                  |
| Age (per 1 year older age)     | -0.018         | -0.035 | -0.001 | 0.042            | -0.017                                            | -0.028 | -0.006 | <b>0.002</b>     |
| Sex (vs. Male)                 |                |        |        |                  |                                                   |        |        |                  |
| Female                         | 0.103          | -0.223 | 0.428  | 0.536            | 0.217                                             | -0.008 | 0.441  | 0.058            |
| Race/Ethnicity (vs. NHW)       |                |        |        |                  |                                                   |        |        |                  |
| Hispanic                       | -0.071         | -0.525 | 0.383  | 0.760            | 0.080                                             | -0.207 | 0.368  | 0.584            |
| NHB                            | -0.200         | -0.680 | 0.279  | 0.413            | -0.101                                            | -0.394 | 0.193  | 0.502            |
| NH Other                       | 0.591          | -0.024 | 1.206  | 0.060            | 0.373                                             | -0.029 | 0.774  | 0.069            |
| Income (vs. <10K)              |                |        |        |                  |                                                   |        |        |                  |
| 10-20k                         | 0.165          | -1.108 | 1.439  | 0.799            | -0.029                                            | -0.709 | 0.651  | 0.933            |
| 20-50k                         | -0.230         | -1.305 | 0.844  | 0.674            | 0.049                                             | -0.524 | 0.623  | 0.866            |
| >50k                           | -0.457         | -1.517 | 0.603  | 0.398            | -0.083                                            | -0.641 | 0.474  | 0.770            |

\*Difference in means at one year

NHW=Non-Hispanic White

NHB=Non-Hispanic Black

NH Other=Non-Hispanic Other

Note: Significant p-values are bolded
